# Supplementary material for: Combined Single Gene Testing and Genome Sequencing as an Effective Diagnostic Approach for Anophthalmia and Microphthalmia Patients
Source: MDPI journal article supplement (doi:10.3390/genes14081573), 2023-08-01
Supplement: s1 [file s1]

**Supplementary Table S1: Primer sequences**

| Gene                                                                     | Forward primer (5'-3')  | Reverse primer (5'-3') |
|--------------------------------------------------------------------------|-------------------------|------------------------|
| <i>Primer sequences for targeted sequencing and segregation analysis</i> |                         |                        |
| <i>FOXE3</i> (Exon 1)                                                    | GGGTACCGTGAACAGAGTAAG   | TGTAGCAGGAGTTTGAGTCCAG |
| <i>PXDN</i> (Intron 17)                                                  | GTCCACACCTTTTCCAGAG     | GCTAGGTCCTGGTAAAGAAG   |
| <i>VSX2</i> (Exon 2)                                                     | ACGAAATCTGTTCAAAACCTCCG | CTCATCCTGCTCAACCGGTG   |
| <i>PXDN</i> (Exon 17)                                                    | GGAGTTCATGAGCAGCGAAG    | GAATGGCTTCAACACCCCTC   |
| <i>Primer sequences for minigene splice assay</i>                        |                         |                        |
| <i>PXDN</i> (Intron 17)                                                  | TCCCAGATGATTCTCTTTTGC   | AGCTCTAAGATGTCCCCTGG   |
| <i>ACTB</i> (Exons 4-5)                                                  | ACTGGGACGACATGGAGAAG    | TCTCAGCTGTGGTGGTGAAG   |
| <i>RHO</i> (Exon 3-5)                                                    | CGGAGGTCAACAACGAGTCT    | AGGTGTAGGGGATGGGAGAC   |

**Supplementary Table S2: Anophthalmia- and microphthalmia-associated genes as listed in OMIM**

| Gene            | OMIM   | Gene           | OMIM   | Gene            | OMIM   | Gene            | OMIM   |
|-----------------|--------|----------------|--------|-----------------|--------|-----------------|--------|
| <i>ABCB6</i>    | 605452 | <i>ESCO2</i>   | 609353 | <i>NF1</i>      | 613113 | <i>SALL4</i>    | 607343 |
| <i>ALDH1A3</i>  | 600463 | <i>FAM111A</i> | 615292 | <i>NHS</i>      | 300457 | <i>SCLT1</i>    | 611399 |
| <i>ALDH6A1</i>  | 603178 | <i>FANCA</i>   | 607139 | <i>NUP188</i>   | 615587 | <i>SEMA3E</i>   | 608166 |
| <i>ALX1</i>     | 601527 | <i>FANCD2</i>  | 613984 | <i>OCLN</i>     | 602876 | <i>SHH</i>      | 600725 |
| <i>ARHGAP6</i>  | 300118 | <i>FANCF</i>   | 613897 | <i>OLFM2</i>    | 617492 | <i>SIN3A</i>    | 607776 |
| <i>ATOH7</i>    | 609875 | <i>FANCL</i>   | 608111 | <i>OTX2</i>     | 600037 | <i>SIPA1L3</i>  | 616655 |
| <i>B3GALNT2</i> | 610194 | <i>FKRP</i>    | 606596 | <i>PAX2</i>     | 167409 | <i>SIX3</i>     | 603714 |
| <i>BCOR</i>     | 300485 | <i>FKTN</i>    | 607440 | <i>PAX6</i>     | 607108 | <i>SIX6</i>     | 606326 |
| <i>BEST1</i>    | 607854 | <i>FNBP4</i>   | 615265 | <i>PCYT1A</i>   | 123695 | <i>SLC16A12</i> | 611910 |
| <i>BMP4</i>     | 112262 | <i>FOXE3</i>   | 601094 | <i>PDE6D</i>    | 602676 | <i>SLC38A8</i>  | 615585 |
| <i>BRCA1</i>    | 113705 | <i>FREM1</i>   | 608944 | <i>PITX3</i>    | 602669 | <i>SMCHD1</i>   | 614982 |
| <i>BRCA2</i>    | 600185 | <i>FREM2</i>   | 608945 | <i>PLK4</i>     | 605031 | <i>SMG9</i>     | 613176 |
| <i>BRIP1</i>    | 605882 | <i>GDF3</i>    | 606522 | <i>PNPT1</i>    | 610316 | <i>SMOC1</i>    | 608488 |
| <i>C12orf57</i> | 615140 | <i>GDF6</i>    | 601147 | <i>POMGNT1</i>  | 606822 | <i>SNX3</i>     | 605930 |
| <i>C2CD3</i>    | 615944 | <i>GJA1</i>    | 121014 | <i>POMK</i>     | 615247 | <i>SOX2</i>     | 184429 |
| <i>CAPN15</i>   | 603267 | <i>GJA8</i>    | 600897 | <i>POMT1</i>    | 607423 | <i>STRA6</i>    | 610745 |
| <i>CDKL5</i>    | 300203 | <i>GLI2</i>    | 165230 | <i>POMT2</i>    | 607439 | <i>TBC1D20</i>  | 611663 |
| <i>CENPF</i>    | 600236 | <i>GSC</i>     | 138890 | <i>PQBP1</i>    | 300463 | <i>TBC1D32</i>  | 615867 |
| <i>CEP120</i>   | 613446 | <i>GTF2H5</i>  | 608780 | <i>PRMT7</i>    | 610087 | <i>TBL1XR1</i>  | 608628 |
| <i>CHD7</i>     | 608892 | <i>HCCS</i>    | 300056 | <i>PRR12</i>    | 616633 | <i>TCTN2</i>    | 613846 |
| <i>CHUK</i>     | 600664 | <i>HDAC6</i>   | 300272 | <i>PRSS56</i>   | 613858 | <i>TENM3</i>    | 610083 |
| <i>CNTNAP1</i>  | 602346 | <i>HMGB3</i>   | 300193 | <i>PTCH1</i>    | 601309 | <i>TFAP2A</i>   | 107580 |
| <i>COL4A1</i>   | 120130 | <i>HMX1</i>    | 142992 | <i>PUF60</i>    | 604819 | <i>TKFC</i>     | 615844 |
| <i>COX14</i>    | 614478 | <i>HUWE1</i>   | 300697 | <i>PXDN</i>     | 605158 | <i>TMEM216</i>  | 613277 |
| <i>COX7B</i>    | 300885 | <i>INTS1</i>   | 611345 | <i>RAB18</i>    | 602207 | <i>TMT3</i>     | 617218 |
| <i>CRPPA</i>    | 614631 | <i>INTU</i>    | 610621 | <i>RAB3GAP1</i> | 602536 | <i>TMX3</i>     | 616102 |
| <i>CRYAA</i>    | 123580 | <i>KERA</i>    | 603288 | <i>RAB3GAP2</i> | 609275 | <i>TOGARAM1</i> | 617618 |
| <i>CRYBA4</i>   | 123631 | <i>KIF11</i>   | 148760 | <i>RARB</i>     | 180220 | <i>TUBB</i>     | 191130 |
| <i>CRYBB2</i>   | 123620 | <i>LMBRD2</i>  | 619490 | <i>RAX</i>      | 601881 | <i>TUBGCP4</i>  | 609610 |
| <i>DAG1</i>     | 128239 | <i>LRP5</i>    | 603506 | <i>RBBP8</i>    | 604124 | <i>VAX1</i>     | 604294 |
| <i>DOCK6</i>    | 614194 | <i>MAB21L2</i> | 604357 | <i>RBP4</i>     | 180250 | <i>VCAN</i>     | 118661 |
| <i>DONSON</i>   | 611428 | <i>MAF</i>     | 177075 | <i>RERE</i>     | 605226 | <i>VSX2</i>     | 142993 |
| <i>DPYD</i>     | 612779 | <i>MAPRE2</i>  | 605789 | <i>RHOA</i>     | 165390 | <i>WDR37</i>    | 618586 |
| <i>ERCC1</i>    | 126380 | <i>MFRP</i>    | 606227 | <i>RIPK4</i>    | 605706 | <i>YAP1</i>     | 606608 |
| <i>ERCC3</i>    | 133510 | <i>MITF</i>    | 156845 | <i>RPGRIP1L</i> | 610937 | <i>ZBTB20</i>   | 606025 |
| <i>ERCC5</i>    | 133530 | <i>NAA10</i>   | 300013 | <i>RTTN</i>     | 610436 | <i>ZEB2</i>     | 605802 |
| <i>ERCC6</i>    | 609413 | <i>NDUFB11</i> | 300403 | <i>RXYLT1</i>   | 605862 |                 |        |

**a FOXE3**

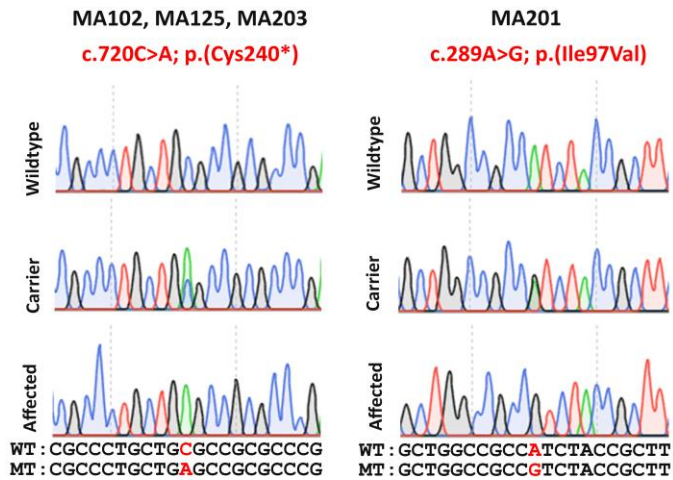

**b PXDN**

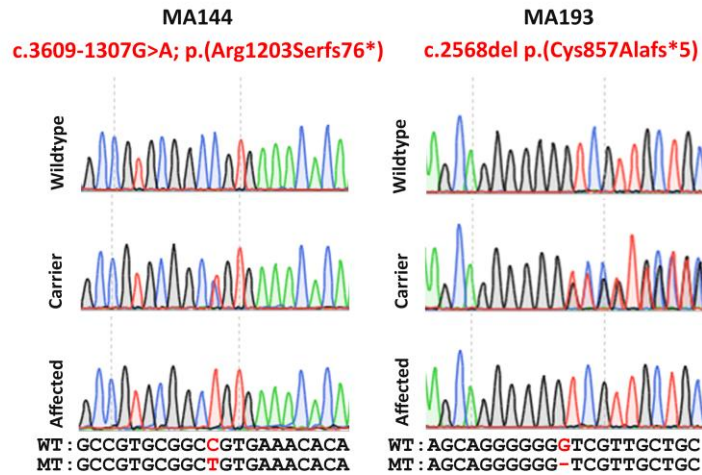

**c VSX2**

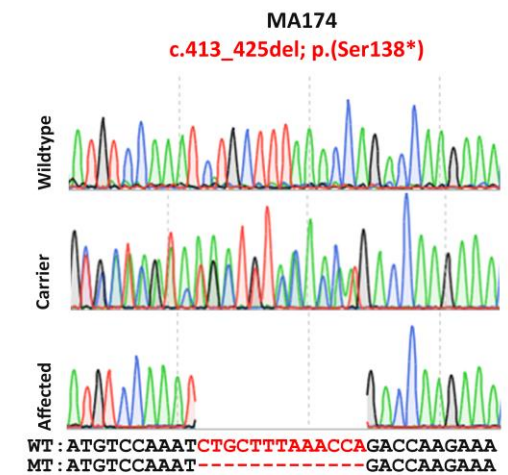

**Supplementary Figure S1: Sanger sequencing chromatograms for all the identified candidate variants in this study.** Co-segregation of the candidate variant with the anophthalmia/microphthalmia phenotype was confirmed in all families. Complete segregation results can be found in Figure 1. For each variant, a representative chromatogram of a non-affected, carrier and an affected individual is provided. MT, mutated sequence; WT, wildtype sequence.
